# Supplementary material for: Prognosis of HIV Patients Receiving Antiretroviral Therapy According to CD4 Counts: A Long-term Follow-up study in Yunnan, China
Source: PubMed Central journal article supplement (PMC5575268; doi:10.1038/s41598-017-10105-7), 2017-08-29
Supplement: 41598_2017_10105_MOESM1_ESM.pdf [file 41598_2017_10105_MOESM1_ESM.pdf]

## **Prognosis of HIV Patients Receiving Antiretroviral Therapy According to CD4 Counts: A Long-term Follow-up study in Yunnan, China**

Li Ren<sup>1,2,3#</sup>, Juan Li<sup>4#</sup>, Shiyi Zhou<sup>5</sup>, Xueshan Xia<sup>6</sup>, Zhenrong Xie<sup>5</sup>, Pan Liu<sup>7</sup>, Yu Xu<sup>5</sup>, Yuan Qian<sup>8</sup>, Huifeng Zhang<sup>2</sup>, , Litang Ma<sup>8</sup>, Qiuwei Pan<sup>4</sup>, Kunhua Wang<sup>1,5\*</sup>

<sup>1</sup>Faculty of Environmental Science and Engineering, Kunming University of Science and Technology, Kunming, 650093, Yunnan Province, China;

<sup>2</sup>The First People's Hospital of Yunnan Province, Kunming, 650031, Yunnan Province, China;

<sup>3</sup>Medical faculty of Kunming University of Science and Technology, Kunming, 650093, Yunnan Province, China;

<sup>4</sup>Department of Gastroenterology and Hepatology, Erasmus University Medical Center Rotterdam, The Netherlands;

<sup>5</sup>Yunnan Institute of Digestive Disease, the First Affiliated Hospital of Kunming Medical University, Kunming, 650032, Yunnan Province, China;

<sup>6</sup>Faculty of Life Science and Technology, Center for Molecular Medicine in Yunnan province, Kunming University of Science and Technology, Kunming, 650093, Yunnan Province, China;

<sup>7</sup>Yan'an Hospital of Kunming Chenggong hospital, Kunming, 650501, Yunnan Province, China;

<sup>8</sup>The First People's Hospital of Zhaotong City, Zhaotong, 657000, Yunnan Province, China.

**#These authors contributed equally.**

**\*Correspondence:**

Kunhua Wang, Yunnan Institute of Digestive Disease, the First Affiliated Hospital of Kunming Medical University, Kunming, 650032, Xichang Road 295, Yunnan Province, China.

Tel: (+86)871-6532 4888 Email: [kunhuawangProf@163.com](mailto:kunhuawangProf@163.com)

**Running title:** Survival of antiretroviral treated HIV Patients

## Supplementary materials

**Table S1. Baseline Characteristics of the Patients who Died at First 6 Months of Follow-Up Period**

| <b>Characteristics</b>                 | <b>Descriptive statistics</b> |
|----------------------------------------|-------------------------------|
| <b>Total</b>                           |                               |
| no.                                    | 82                            |
| <b>Gender, no. (%)</b>                 |                               |
| Male                                   | 58 (70.7)                     |
| Female                                 | 24 (29.3)                     |
| <b>Marital status, no. (%)</b>         |                               |
| Unmarried                              | 11 (13.4)                     |
| Married                                | 61 (74.4)                     |
| Divorced                               | 3 (3.7)                       |
| Widowed                                | 7 (8.5)                       |
| <b>Age at ART initiation, year</b>     |                               |
| Mean (SD)                              | 47.6 (15.8)                   |
| Median (IQR)                           | 42.0 (34.3-60.0)              |
| <b>WHO HIV Clinical Stage, no. (%)</b> |                               |
| Stage I/II                             | 35 (42.7)                     |
| Stage III/IV                           | 47 (57.3)                     |
| <b>CD4, cells/<math>\mu</math>l</b>    |                               |
| Mean (SD)                              | 152.7 (128.9)                 |
| Median (IQR)                           | 129.0 (44.5-215.0)            |
| <50                                    | 21 (25.6)                     |
| 50-199                                 | 32 (39.0)                     |
| $\geq$ 200                             | 22 (26.8)                     |
| <b>Transmission category, no. (%)</b>  |                               |
| Injecting drug users (IDU)             | 12 (14.6)                     |
| Homosexual                             | 0 (0)                         |
| Heterosexual                           | 53 (64.6)                     |
| Others/unknown                         | 17 (20.7)                     |

ART indicates antiretroviral treatment

**Table S2. Testing the Proportional Hazards Assumption of a Cox Regression Model Fit<sup>a</sup>**

|                             | rho    | chisq  | p           |
|-----------------------------|--------|--------|-------------|
| Gender                      |        |        |             |
| Female                      | -      | -      | (Reference) |
| Male                        | -0.014 | 0.040  | .841        |
| Marital status              |        |        |             |
| Married                     | -      | -      | (Reference) |
| Unmarried                   | -0.071 | 1.073  | .300        |
| Divorced                    | 0.107  | 2.25   | .134        |
| Widowed                     | 0.066  | 0.991  | .320        |
| Age at ART initiation, year |        |        |             |
| WHO HIV Clinical Stage      |        |        |             |
| Stage I/II                  | -      | -      | (Reference) |
| Stage III/IV                | -0.081 | 1.536  | .215        |
| CD4, cells/ $\mu$ l         |        |        |             |
| $\geq$ 200                  | -      | -      | (Reference) |
| 50-199                      | -0.104 | 2.425  | .119        |
| <50                         | -0.150 | 5.029  | .025        |
| Transmission category       |        |        |             |
| Blood transfusion           | -      | -      | (Reference) |
| Injecting drug users (IDU)  | -0.031 | 0.192  | .661        |
| Homosexual                  | 0.003  | 0.002  | .957        |
| Heterosexual                | -0.039 | 0.296  | .586        |
| Mother-to-Child             | -0.013 | 0.036  | .850        |
| Others/unknown              | -0.022 | 0.093  | .760        |
| GLOBAL <sup>b</sup>         | NA     | 19.958 | .096        |

<sup>a</sup>Computed by `cox.zph()` function in package of "survival" from R

<sup>b</sup>Indicates the global test

rho = Spearman's rank correlation coefficient

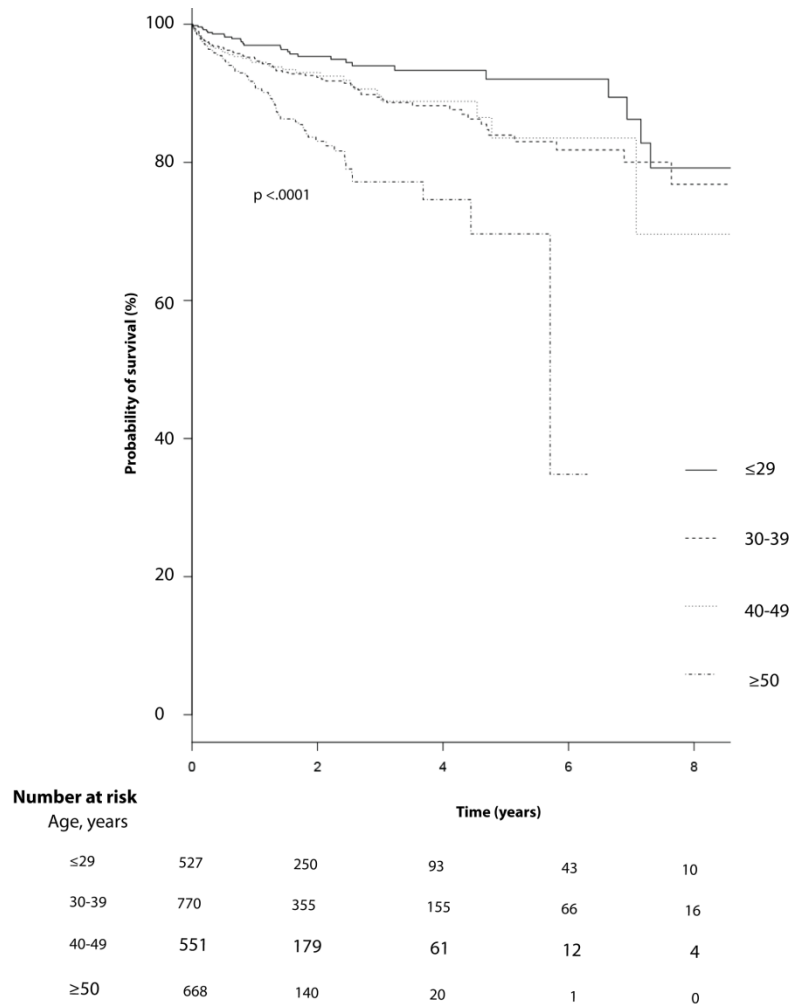

**Figure S1. Cumulative mortality from all-cause mortality for study population infected by human immunodeficiency virus (HIV) receiving antiretroviral therapy (ART) according to age ( $p < .0001$ ). Corresponding numbers at risk at different time-points split by age categories have been indicated below the graph.**

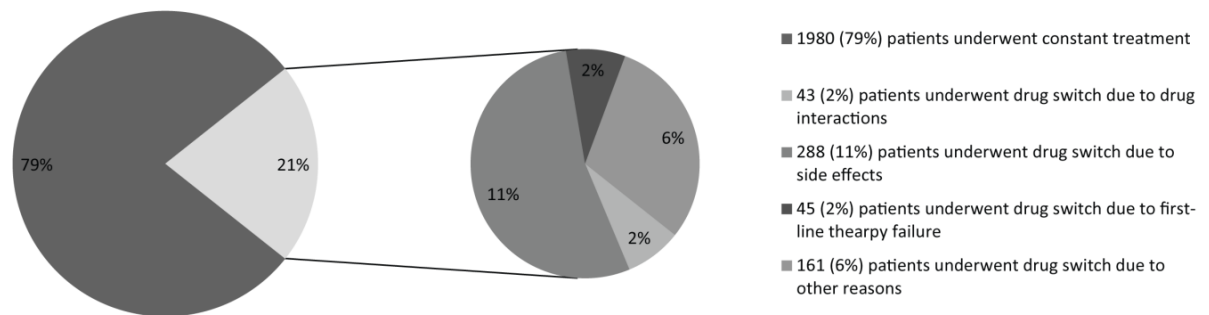

**Figure S2. The Pie Chart showing the percentage of patients who switched drugs during Antiretroviral Therapy.**

A. Histograms

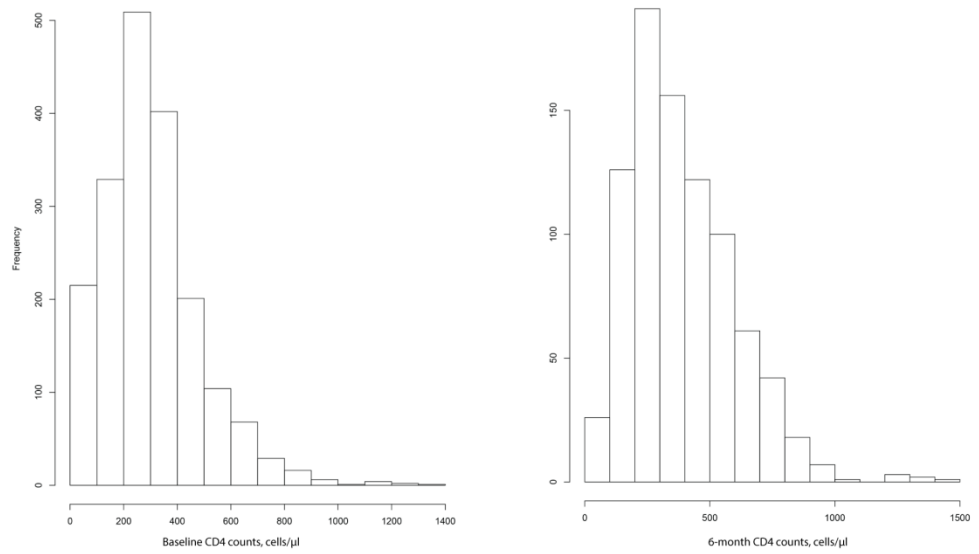

B. Stacked bar chart

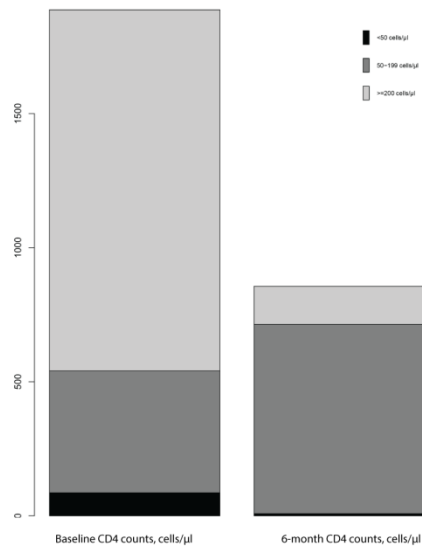

**Figure S3: Plots presenting the values of baseline CD4 counts and 6-month CD4 counts for the patients who had survived 6 months after antiretroviral therapy. (A): histograms for continuous data of CD4 counts; (B): stacked bar chart for categorical data of CD4 counts: <50, 50-199, and  $\geq$ 200 (unit: cells/ $\mu$ l).**

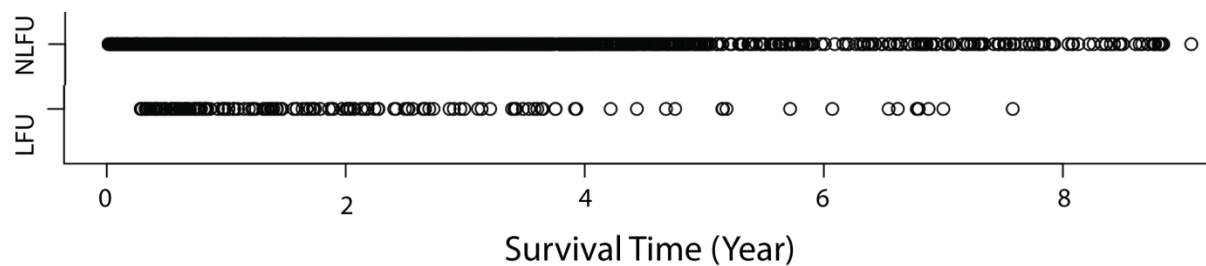

**Figure S4: Plot of loss to follow up or not loss to follow up against survival time.** LFU = loss to follow up; NLFU = not loss to follow up.

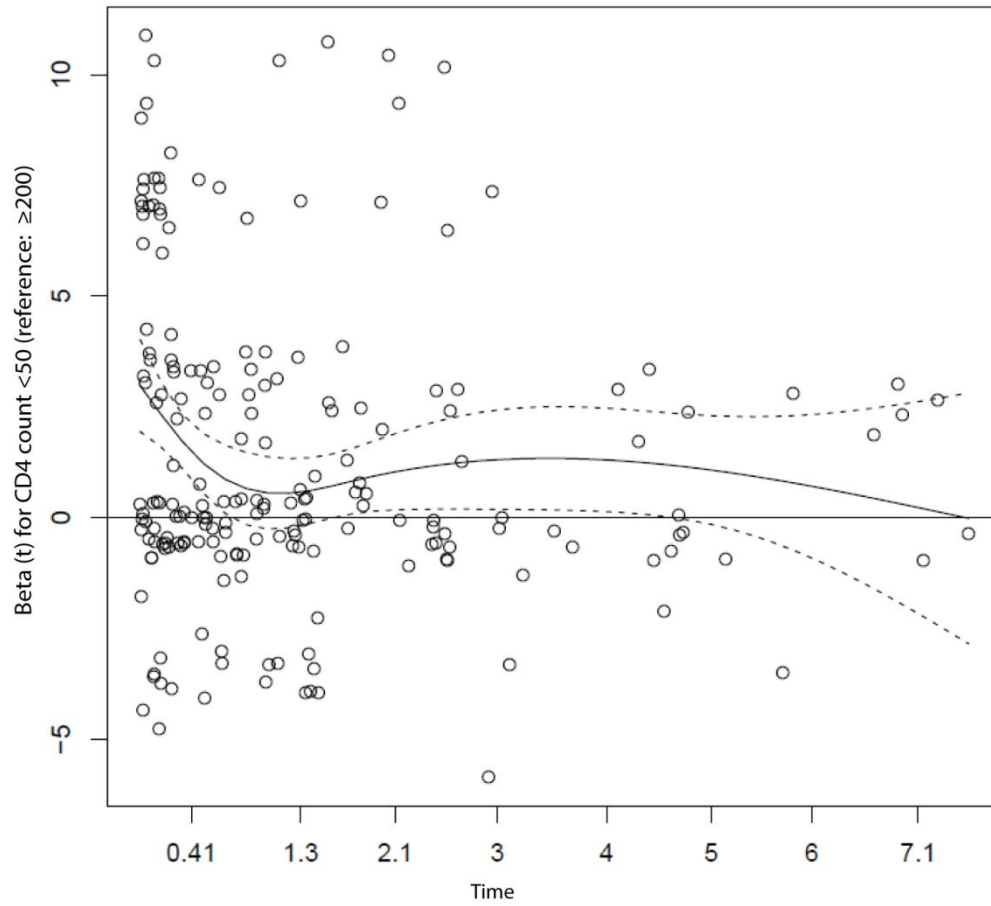

**Figure S5: Plot of scaled Schoenfeld residuals against transformed time for covariate CD4 count in Cox model fit.** The upper solid line is a smoothing spline fit to the plot, with the broken lines representing a  $\pm 2$ -standard-error band around the fit; and the bottom solid line is a horizontal line.



```

# Import data.....
data1 <- read.csv ('HIV_data.csv')

# Split dataset into two time intervals: <=0.5 year; >0.5 year.....
data2<-survival::survSplit(Surv(time,event)~.,data1,cut=c(0.5),
      episode = "tgroup",
      id="id")

# Cox model.....

# 1.Univariate analysis
## CD4 for two time intervals
summary(coxph(Surv(tstart,time,event)~CD4:strata(tgroup),data=data2))
## Other factors
variables<-c('sex','marriage','transmission','WHO_stage','age')
lapply (variables, function(x)summary(coxph(Surv(time,event)~data2[,x],data=data2)))

# 2.Multivariate analysis
summary(coxph(Surv(tstart,Time_m,Event)~CD4:strata(tgroup)+sex+marriage+transmission+WHO_s
tage+age, data=data2))

```

**Figure S6. R code for performing Cox proportional regression analyses**
